# Supplementary material for: Recognition of emotion and pain by owners benefits the welfare of donkeys in a challenging working environment
Source: PeerJ. 2023 Aug 8;11:e15747. doi: 10.7717/peerj.15747 (PMC10416770; doi:10.7717/peerj.15747)
Supplement: File S1 [file peerj-11-15747-s001.xlsx]

## Sheet: Original Data
Owner ID	Owner age (years)	Region	Area	How you assess that the load you are putting on your donkey is practical for him?	Do you use padding under the saddle?	How is the speed of loaded donkey selected?	Does the duration of work per day vary by season?	Is there availability of feed during the working day?	Is there availability of water during the working day?	Have you seen load associated injuries in your donkey?	What is the cause of load associated injuries?	The weight that you put on your animal, is it good for your donkey?	What is the reason that people overload their donkeys?	Have you noticed an increase or decrease in general body condition since you bought this donkey?	Do you think your donkey has emotions?	Do you think your donkey feels pain?	Would you follow loading guidelines (if available) for benefit of your donkey?
1	41-50	Cholistan	peri-urban	adding load approximately	no	triggered	yes	yes	no	lameness	overload	yes	to finish work earlier	no Change in BCS	no	no	yes
2	31-40	Cholistan	peri-urban	adding load approximately	yes	triggered	no	no	no	wound, Lameness	overload	i donot know	to finish work earlier	no Change in BCS	i donot know	yes	yes
3	18-30	Cholistan	peri-urban	adding load approximately	no	triggered	yes	no	no	lameness	overload	yes	to finish work earlier	no Change in BCS	no	no	i donot know
4	18-30	Cholistan	peri-urban	adding load approximately	no	triggered	yes	no	no	lameness	overload	yes	to finish work earlier	no Change in BCS	no	no	i donot know
5	31-40	Cholistan	peri-urban	adding load approximately	yes	triggered	yes	yes	no	lameness	overload	yes	to finish work earlier	no Change in BCS	yes	no	i donot know
6	31-40	Cholistan	peri-urban	adding load approximately	no	triggered	yes	no	no	wound	overload	no	to finish work earlier	no Change in BCS	no	no	i donot know
7	31-40	Cholistan	peri-urban	adding load approximately	no	triggered	yes	no	no	wound	overload	no	for more income	no Change in BCS	no	no	i donot know
8	31-40	Cholistan	peri-urban	adding load approximately	no	triggered	yes	no	no	wound	overload	no	for more income	no Change in BCS	no	no	i donot know
9	31-40	Cholistan	peri-urban	adding load approximately	no	triggered	no	no	no	wound	overload	no	to finish work earlier	no Change in BCS	no	no	i donot know
10	18-30	Cholistan	peri-urban	adding load approximately	yes	triggered	yes	no	no	lameness	overload	no	for more income	no Change in BCS	no	no	i donot know
11	31-40	Cholistan	peri-urban	checking donkey behavior	yes	triggered	yes	no	no	lameness	overload	no	for more income	no Change in BCS	no	no	i donot know
12	31-40	Cholistan	peri-urban	adding load approximately	no	triggered	yes	no	no	lameness	overload	no	to finish work earlier	no Change in BCS	no	no	i donot know
13	31-40	Cholistan	peri-urban	checking donkey behavior	no	triggered	yes	no	no	lameness	overload	no	to finish work earlier	no Change in BCS	no	no	i donot know
14	31-40	Cholistan	peri-urban	checking donkey behavior	no	triggered	yes	no	no	lameness	overload	no	to finish work earlier	no Change in BCS	yes	no	i donot know
15	31-40	Cholistan	peri-urban	checking donkey behavior	no	triggered	yes	no	no	lameness	overload	no	to finish work earlier	no Change in BCS	yes	no	i donot know
16	18-30	Cholistan	peri-urban	adding load approximately	no	triggered	yes	no	no	lameness	overload	yes	to finish work earlier	no Change in BCS	no	no	i donot know
17	41-50	Cholistan	peri-urban	adding load approximately	no	triggered	yes	no	no	lameness	overload	yes	to finish work earlier	no Change in BCS	no	no	i donot know
18	41-50	Cholistan	peri-urban	adding load approximately	no	triggered	yes	no	no	wound	overload	yes	for more income	no Change in BCS	no	yes	i donot know
19	31-40	Cholistan	peri-urban	adding load approximately	yes	triggered	yes	no	no	lameness	overload	no	to finish work earlier	no Change in BCS	yes	no	i donot know
20	18-30	Cholistan	peri-urban	adding load approximately	yes	triggered	yes	no	no	lameness	overload	no	to finish work earlier	no Change in BCS	yes	no	i donot know
21	31-40	Cholistan	peri-urban	checking donkey behavior	yes	triggered	yes	no	no	wound	overload	no	to finish work earlier	no Change in BCS	yes	no	i donot know
22	31-40	Cholistan	peri-urban	adding load approximately	no	triggered	yes	no	no	lameness	overload	no	to finish work earlier	no Change in BCS	no	no	i donot know
23	31-40	Cholistan	peri-urban	adding load approximately	yes	triggered	yes	yes	no	lameness	overload	yes	to finish work earlier	no Change in BCS	yes	no	i donot know
24	18-30	Cholistan	peri-urban	checking donkey behavior	no	triggered	yes	no	no	lameness	overload	no	to finish work earlier	no Change in BCS	no	no	i donot know
25	31-40	Cholistan	peri-urban	checking donkey behavior	no	triggered	yes	no	no	lameness	overload	no	to finish work earlier	no Change in BCS	no	no	i donot know
26	31-40	Cholistan	peri-urban	adding load approximately	no	triggered	yes	no	no	lameness	type of load	yes	for more income	bcs decreased	yes	yes	i donot know
27	41-50	Cholistan	peri-urban	adding load approximately	no	triggered	yes	no	no	lameness	type of load	yes	for more income	bcs decreased	yes	yes	yes
28	31-40	Cholistan	peri-urban	adding load approximately	no	triggered	yes	yes	no	lameness	overload	Yes	to finish work earlier	bcs decreased	yes	yes	i donot know
29	31-40	Cholistan	peri-urban	adding load approximately	no	triggered	yes	no	no	lameness	type of load	yes	to finish work earlier	bcs decreased	yes	yes	i donot know
30	31-40	Cholistan	peri-urban	adding load approximately	yes	triggered	yes	yes	no	lameness	type of load	yes	for more income	bcs decreased	yes	yes	i donot know
31	41-50	Cholistan	peri-urban	adding load approximately	no	triggered	yes	yes	no	lameness	overload	yes	for more income	bcs decreased	yes	yes	i donot know
32	41-50	Cholistan	peri-urban	adding load approximately	no	triggered	yes	yes	no	lameness	overload	i donot know	to finish work earlier	bcs decreased	yes	yes	i donot know
33	41-50	Cholistan	peri-urban	adding load approximately	no	triggered	yes	yes	no	lameness	overload	yes	to finish work earlier	no Change in BCS	yes	yes	i donot know
34	18-30	Cholistan	peri-urban	adding load approximately	no	triggered	yes	yes	yes	lameness	overload	no	to finish work earlier	no Change in BCS	yes	yes	i donot know
35	31-40	Cholistan	peri-urban	adding load approximately	no	triggered	yes	yes	yes	lameness	overload	no	to finish work earlier	no Change in BCS	no	no	i donot know
36	31-40	Cholistan	peri-urban	checking donkey behavior	no	triggered	yes	no	no	wound, Lameness	overload	no	to finish work earlier	no Change in BCS	no	yes	i donot know
37	18--30	Cholistan	peri-urban	adding load approximately	yes	triggered	yes	no	no	wound, Lameness	overload	i donot know	to finish work earlier	no Change in BCS	yes	yes	i donot know
38	31-40	Cholistan	peri-urban	adding load approximately	yes	triggered	yes	yes	no	lameness	overload	yes	to finish work earlier	no Change in BCS	yes	no	i donot know
39	18-30	Cholistan	peri-urban	adding load approximately	no	triggered	yes	yes	yes	lameness	overload	no	to finish work earlier	no Change in BCS	yes	yes	i donot know
40	31-40	Cholistan	peri-urban	adding load approximately	no	triggered	yes	yes	yes	lameness	overload	no	to finish work earlier	bcs decreased	no	no	i donot know
41	18-30	Cholistan	urban	adding load approximately	no	triggered	yes	yes	yes	lameness	overload	no	to finish work earlier	no Change in BCS	no	no	yes
42	18-30	Cholistan	peri-urban	adding load approximately	no	triggered	yes	yes	no	lameness	overload	no	to finish work earlier	no Change in BCS	no	no	i donot know
43	more than 50	Cholistan	peri-urban	adding load approximately	yes	triggered	yes	yes	no	lameness	overload	yes	to finish work earlier	no Change in BCS	yes	no	i donot know
44	31-40	Cholistan	peri-urban	adding load approximately	no	triggered	yes	yes	no	lameness	overload	no	to finish work earlier	no Change in BCS	no	no	i donot know
45	18-30	Cholistan	peri-urban	adding load approximately	no	triggered	yes	no	no	lameness	overload	no	to finish work earlier	no Change in BCS	no	yes	yes
46	31-40	Cholistan	urban	adding load approximately	yes	triggered	no	no	no	wound, Lameness	practices of Loading/Unloading	i donot know	for more income	bcs decreased	i donot know	yes	yes
47	41-50	Cholistan	peri-urban	i don't know	yes	triggered	no	no	no	wound, Lameness, back pain	overload	yes	for more income	no Change in BCS	yes	yes	i donot know
48	31-40	Cholistan	peri-urban	adding load approximately	no	triggered	yes	no	no	wound, Lameness	overload	no	to finish work earlier	no Change in BCS	no	yes	i donot know
49	18-30	Cholistan	peri-urban	adding load approximately	no	triggered	yes	no	no	wound, Lameness	overload	no	to finish work earlier	no Change in BCS	no	yes	i donot know
50	18-30	Cholistan	peri-urban	adding load approximately	yes	triggered	yes	no	no	wound, Lameness	overload	no	for more income	no Change in BCS	yes	yes	i donot know
51	18-30	Cholistan	peri-urban	adding load approximately	yes	triggered	yes	no	no	wound, Lameness	overload	yes	to finish work earlier	no Change in BCS	no	no	i donot know
52	41-50	Cholistan	peri-urban	checking donkey behavior	no	triggered	yes	no	no	wound, Lameness	overload	yes	for more income	no Change in BCS	no	no	i donot know
53	18-30	Cholistan	peri-urban	adding load approximately	no	triggered	yes	no	no	wound, Lameness	overload	yes	to finish work earlier	no Change in BCS	no	yes	i donot know
54	31-40	Cholistan	peri-urban	adding load approximately	no	triggered	yes	no	no	wound, Lameness	overload	yes	for more income	no Change in BCS	no	yes	yes
55	18-30	Cholistan	Urban	I don't know	No	Triggered	No	No	No	Wound, Lameness	Practices of Loading/Unloading	I donot know	To finish work earlier	No Change in BCS	I donot know	yes	yes
56	18-30	Cholistan	urban	adding load approximately	yes	triggered	no	no	no	wound	overload	yes	to finish work earlier	no Change in BCS	i donot know	no	i donot know
57	41-50	Cholistan	peri-urban	adding load approximately	yes	triggered	yes	no	no	wound, Lameness	overload	yes	for more income	bcs decreased	yes	yes	i donot know
58	31-40	Cholistan	peri-urban	adding load approximately	yes	triggered	no	no	no	wound, Lameness, back pain	type of load	i donot know	to finish work earlier	no Change in BCS	i donot know	yes	i donot know
59	31-40	Cholistan	peri-urban	adding load approximately	yes	triggered	yes	no	no	wound, back pain	overload	yes	for more income	bcs decreased	i donot know	i donot know	i donot know
60	41-50	Cholistan	urban	adding load approximately	yes	triggered	yes	no	no	wound, Lameness	overload	i donot know	to finish work earlier	bcs decreased	i donot know	yes	i donot know
61	31-40	Cholistan	urban	adding load approximately	yes	triggered	no	no	no	wound, Lameness, back pain	practices of Loading/Unloading	i donot know	to finish work earlier	no Change in BCS	yes	yes	i donot know
62	41-50	Cholistan	urban	checking donkey behavior	yes	triggered	yes	no	no	wound	overload	yes	for more income	no Change in BCS	i donot know	yes	yes
63	31-40	Cholistan	peri-urban	adding load approximately	yes	triggered	no	no	no	wound, Lameness, back pain	overload	yes	for more income	bcs decreased	yes	yes	yes
64	31-40	Cholistan	peri-urban	adding load approximately	yes	triggered	no	no	no	wound, Lameness	overload	yes	for more income	no Change in BCS	yes	i donot know	yes
65	41-50	Cholistan	peri-urban	i don't know	yes	triggered	no	no	no	lameness	overload	yes	for more income	bcs decreased	yes	i donot know	yes
66	18-30	Cholistan	urban	i don't know	yes	triggered	no	no	no	wound	overload	yes	for more income	bcs decreased	yes	i donot know	yes
67	31-40	Cholistan	peri-urban	adding load approximately	yes	triggered	no	no	no	wound	overload	yes	for more income	no Change in BCS	yes	i donot know	yes
68	18-30	Cholistan	peri-urban	adding load approximately	yes	triggered	no	no	no	wound	overload	i donot know	for more income	bcs decreased	yes	i donot know	i donot know
69	18-30	Cholistan	urban	adding load approximately	yes	triggered	no	no	no	wound, Lameness, back pain	type of load	i donot know	to finish work earlier	bcs decreased	i donot know	i donot know	i donot know
70	31-40	Cholistan	peri-urban	adding load approximately	yes	triggered	no	no	no	wound, Lameness	overload	i donot know	for more income	bcs decreased	yes	yes	i donot know
71	31-40	Cholistan	urban	adding load approximately	yes	triggered	no	no	no	wound	overload	i donot know	to finish work earlier	no Change in BCS	i donot know	no	no
72	31-40	Cholistan	peri-urban	i don't know	yes	triggered	no	no	no	lameness	overload	i donot know	for more income	no Change in BCS	yes	i donot know	no
73	41-50	Cholistan	urban	i don't know	yes	triggered	no	no	no	wound, back pain	type of load	i donot know	to finish work earlier	bcs decreased	i donot know	no	i donot know
74	41-50	Cholistan	peri-urban	adding load approximately	yes	triggered	no	no	no	wound, Lameness, back pain	type of load	no	to finish work earlier	bcs decreased	no	no	no
75	41-50	Cholistan	urban	adding load approximately	yes	triggered	yes	no	no	wound, Lameness	type of load	i donot know	for more income	no Change in BCS	yes	yes	i donot know
76	41-50	Cholistan	urban	i don't know	yes	triggered	no	no	no	wound, Lameness	overload	no	to finish work earlier	no Change in BCS	no	i donot know	i donot know
77	31-40	Cholistan	peri-urban	adding load approximately	yes	triggered	no	no	no	Wound, back pain	type of load	i donot know	for more income	no Change in BCS	i donot know	i donot know	i donot know
78	41-50	Cholistan	peri-urban	adding load approximately	yes	triggered	no	no	no	wound, back pain	overload	i donot know	for more income, to finish work earlier	no Change in BCS	yes	yes	yes
79	31-40	Cholistan	urban	adding load approximately	yes	triggered	no	no	no	wound, Lameness	practices of Loading/Unloading	i donot know	for more income	bcs decreased	i donot know	yes	yes
80	41-50	Cholistan	peri-urban	i don't know	yes	triggered	no	no	no	wound, Lameness, back pain	overload	yes	for more income	no Change in BCS	yes	yes	i donot know
81	31-40	Cholistan	urban	adding load approximately	yes	triggered	no	no	no	wound, Lameness	overload	i donot know	for more income	no Change in BCS	yes	yes	i donot know
82	18-30	Cholistan	peri-urban	adding load approximately	yes	triggered	no	no	no	wound, back pain	overload	i donot know	for more income, to finish work earlier	bcs decreased	i donot know	yes	yes
83	41-50	Cholistan	urban	i don't know	yes	triggered	no	no	no	wound, Lameness	practices of Loading/Unloading	yes	for more income	no Change in BCS	yes	yes	i donot know
1	41-50	Faisalabad	peri-urban	by weighing load	yes	chosen by donkey	yes	no	yes	lameness	overload	yes	for more income	no Change in BCS	yes	yes	yes
2	31-30	Faisalabad	rural	checking donkey behavior	yes	triggered	yes	yes	yes	wound	overload	yes	for more income	bcs decreased	yes	yes	no
3	41-50	Faisalabad	rural	checking donkey behavior	yes	triggered	yes	no	yes	lameness	overload	yes	for more income	no Change in BCS	yes	yes	yes
4	41-50	Faisalabad	peri-urban	checking donkey behavior	yes	triggered	yes	yes	yes	back pain	overload	no	for more income	no Change in BCS	yes	yes	yes
5	41-50	Faisalabad	rural	by weighing load	yes	chosen by donkey	yes	yes	yes	no injuries observed	practices of Loading/Unloading	yes	for more income	no Change in BCS	yes	yes	yes
6	41-50	Faisalabad	rural	by weighing load	yes	chosen by donkey	yes	yes	yes	lameness	overload	no	for more income	bcs decreased	yes	yes	yes
7	31-40	Faisalabad	rural	by weighing load	yes	chosen by donkey	no	yes	yes	lameness	overload	no	for more income	bcs decreased	yes	yes	yes
8	41-50	Faisalabad	peri-urban	checking donkey behavior	yes	triggered	yes	yes	yes	lameness	overload	no	for more income	bcs decreased	yes	yes	yes
9	41-50	Faisalabad	peri-urban	checking donkey behavior	yes	chosen by donkey	yes	yes	yes	back pain	overload	no	to finish work earlier	bcs decreased	yes	yes	yes
10	31-40	Faisalabad	peri-urban	checking donkey behavior	yes	chosen by donkey	yes	yes	yes	lameness	overload	no	for more income	bcs decreased	yes	yes	yes
11	41-50	Faisalabad	peri-urban	checking donkey behavior	yes	chosen by donkey	yes	yes	yes	lameness	overload	no	for more income	bcs decreased	yes	yes	yes
12	18-30	Faisalabad	peri-urban	by weighing load	yes	chosen by donkey	yes	yes	yes	back pain	overload	no	for more income	bcs decreased	yes	yes	yes
13	31-40	Faisalabad	peri-urban	by weighing load	yes	triggered	no	no	no	lameness	overload	no	to finish work earlier	bcs increased	yes	yes	yes
14	31-40	Faisalabad	peri-urban	by weighing load	yes	chosen by donkey	yes	yes	yes	no injuries observed	practices of Loading/Unloading	yes	for more income	bcs increased	yes	yes	yes
15	18-30	Faisalabad	peri-urban	checking donkey behavior	yes	triggered	yes	yes	yes	no injuries observed	overload	no	to finish work earlier	bcs increased	yes	yes	yes
16	18-30	Faisalabad	peri-urban	by weighing load	yes	triggered	yes	yes	yes	no injuries observed	overload	yes	for more income	no Change in BCS	yes	yes	yes
17	41-50	Faisalabad	rural	adding load approximately	yes	triggered	yes	yes	yes	back pain	overload	i donot know	for more income	no Change in BCS	i donot know	i donot know	i donot know
18	18-30	Faisalabad	peri-urban	checking donkey behavior	yes	triggered	yes	yes	yes	lameness	type of load	no	for more income	bcs decreased	yes	yes	yes
19	31-40	Faisalabad	rural	checking donkey behavior	yes	chosen by donkey	yes	yes	yes	lameness	overload	yes	to finish work earlier	bcs increased	yes	yes	no
20	31-40	Faisalabad	peri-urban	checking donkey behavior	yes	chosen by donkey	yes	yes	yes	back pain	overload	i donot know	for more income	no Change in BCS	yes	yes	yes
21	41-50	Faisalabad	rural	checking donkey behavior	yes	triggered	yes	yes	yes	wound	type of load	yes	for more income	bcs decreased	yes	yes	yes
22	18-30	Faisalabad	urban	i don't know	yes	triggered	yes	yes	yes	lameness	overload	no	for more income	no Change in BCS	yes	yes	yes
23	18-30	Faisalabad	peri-urban	by weighing load	yes	triggered	yes	yes	yes	no injuries observed	overload	yes	for more income	no Change in BCS	yes	yes	yes
24	31-40	Faisalabad	rural	by weighing load	yes	triggered	yes	yes	yes	no injuries observed	overload	no	for more income	no Change in BCS	yes	yes	yes
25	31-40	Faisalabad	rural	by weighing load	yes	triggered	yes	yes	yes	no injuries observed	overload	no	for more income	no Change in BCS	yes	yes	yes
26	31-40	Faisalabad	rural	by weighing load	yes	triggered	yes	yes	yes	no injuries observed	overload	no	for more income	no Change in BCS	yes	yes	yes
27	31-40	Faisalabad	rural	by weighing load	yes	triggered	yes	yes	yes	no injuries observed	overload	no	for more income	no Change in BCS	yes	yes	yes
28	18-30	Faisalabad	peri-urban	by weighing load	yes	triggered	yes	yes	yes	no injuries observed	overload	yes	for more income	no Change in BCS	yes	yes	yes
29	18-30	Faisalabad	peri-urban	by weighing load	yes	triggered	yes	yes	yes	no injuries observed	overload	yes	for more income	no Change in BCS	yes	yes	yes
30	18-30	Faisalabad	rural	adding load approximately	no	triggered	yes	yes	yes	lameness	practices of Loading/Unloading	yes	to finish work earlier	no Change in BCS	yes	yes	yes
31	31-40	Faisalabad	peri-urban	checking donkey behavior	yes	chosen by donkey	yes	yes	yes	back pain	overload	i donot know	to finish work earlier	no Change in BCS	yes	yes	yes
32	18-30	Faisalabad	peri-urban	adding load approximately	yes	chosen by donkey	yes	yes	yes	wound	type of load	yes	to finish work earlier	no Change in BCS	no	no	i donot know
33	41-50	Faisalabad	rural	by weighing load	yes	chosen by donkey	yes	yes	yes	no injuries observed	overload	yes	to finish work earlier	bcs increased	i donot know	i donot know	yes
34	41-50	Faisalabad	rural	checking donkey behavior	yes	triggered	yes	yes	yes	wound	practices of Loading/Unloading	i donot know	for more income	bcs decreased	yes	yes	i donot know
35	18-30	Faisalabad	peri-urban	by weighing load	yes	triggered	yes	yes	yes	no injuries observed	overload	yes	for more income	no Change in BCS	yes	yes	yes
36	18-30	Faisalabad	rural	adding load approximately	yes	triggered	yes	yes	yes	wound	practices of Loading/Unloading	yes	to finish work earlier	bcs increased	yes	yes	yes
37	41-50	Faisalabad	urban	adding load approximately	yes	triggered	yes	yes	yes	no injuries observed	overload	no	for more income	no Change in BCS	yes	yes	yes
38	41-50	Faisalabad	peri-urban	checking donkey behavior	yes	triggered	yes	yes	yes	wound	type of load	no	for more income	bcs decreased	yes	yes	yes
39	31-40	Faisalabad	rural	adding load approximately	yes	triggered	yes	yes	yes	no injuries observed	overload	i donot know	for more income	no Change in BCS	yes	yes	yes
40	41-50	Faisalabad	urban	checking donkey behavior	yes	triggered	yes	yes	yes	lameness	overload	no	to finish work earlier	no Change in BCS	yes	yes	yes
41	31-40	Faisalabad	peri-urban	adding load approximately	yes	triggered	yes	yes	yes	lameness	overload	no	to finish work earlier	no Change in BCS	yes	yes	yes
42	18-30	Faisalabad	rural	adding load approximately	yes	triggered	yes	yes	yes	lameness	overload	no	for more income	no Change in BCS	yes	yes	yes
43	41-50	Faisalabad	peri-urban	checking donkey behavior	yes	triggered	yes	yes	yes	lameness	practices of Loading/Unloading	yes	for more income	no Change in BCS	yes	yes	yes
44	31-40	Faisalabad	rural	adding load approximately	yes	chosen by donkey	yes	yes	yes	back pain	overload	yes	to finish work earlier	no Change in BCS	yes	yes	yes
45	31-40	Faisalabad	rural	adding load approximately	yes	chosen by donkey	yes	yes	yes	lameness	practices of Loading/Unloading	no	to finish work earlier	bcs increased	yes	yes	yes
46	31-40	Faisalabad	urban	checking donkey behavior	yes	triggered	yes	yes	yes	lameness	overload	no	for more income	no Change in BCS	yes	yes	yes
47	31-40	Faisalabad	peri-urban	checking donkey behavior	yes	chosen by donkey	yes	yes	yes	lameness	overload	no	for more income	bcs decreased	yes	yes	yes
48	41-50	Faisalabad	urban	adding load approximately	yes	triggered	yes	yes	yes	no injuries observed	overload	yes	for more income	no Change in BCS	yes	yes	yes
49	41-50	Faisalabad	urban	adding load approximately	yes	triggered	yes	yes	yes	no injuries observed	overload	no	for more income	no Change in BCS	yes	yes	yes
50	41-50	Faisalabad	urban	adding load approximately	yes	triggered	yes	yes	yes	no injuries observed	overload	yes	for more income	no Change in BCS	yes	yes	yes
51	41-50	Faisalabad	urban	adding load approximately	yes	triggered	yes	yes	yes	no injuries observed	overload	yes	for more income	no Change in BCS	yes	yes	yes
52	31-40	Faisalabad	rural	by weighing load	yes	triggered	yes	yes	yes	no injuries observed	overload	no	for more income	no Change in BCS	yes	yes	yes
53	41-50	Faisalabad	rural	by weighing load	yes	triggered	yes	yes	yes	wound	type of load	i donot know	for more income	no Change in BCS	i donot know	i donot know	i donot know
54	31-40	Faisalabad	peri-urban	adding load approximately	yes	triggered	yes	yes	yes	lameness	overload	yes	for more income	bcs decreased	yes	yes	yes
55	18-30	Faisalabad	peri-urban	checking donkey behavior	yes	chosen by donkey	no	yes	yes	back pain	overload	i donot know	to finish work earlier	no Change in BCS	yes	yes	yes
56	41-50	Faisalabad	urban	checking donkey behavior	yes	chosen by donkey	yes	yes	yes	back pain	overload	i donot know	for more income	bcs decreased	yes	yes	yes
57	31-40	Faisalabad	urban	by weighing load	yes	chosen by donkey	yes	yes	yes	no injuries observed	overload	i donot know	for more income	bcs increased	yes	yes	yes
58	31-40	Faisalabad	peri-urban	adding load approximately	yes	chosen by donkey	yes	yes	yes	wound	type of load	i donot know	to finish work earlier	bcs decreased	yes	yes	yes
59	41-50	Faisalabad	urban	checking donkey behavior	yes	triggered	yes	yes	yes	wound	overload	i donot know	for more income	no Change in BCS	yes	yes	yes
60	31-40	Faisalabad	rural	by weighing load	yes	triggered	yes	yes	yes	no injuries observed	overload	no	for more income	no Change in BCS	yes	yes	yes
61	31-40	Faisalabad	rural	by weighing load	yes	triggered	yes	yes	yes	no injuries observed	overload	no	for more income	no Change in BCS	yes	yes	yes
62	31-40	Faisalabad	rural	by weighing load	yes	triggered	yes	yes	yes	no injuries observed	overload	no	for more income	no Change in BCS	yes	yes	yes
63	31-40	Faisalabad	rural	by weighing load	yes	triggered	yes	yes	yes	no injuries observed	overload	no	for more income	no Change in BCS	yes	yes	yes
64	31-40	Faisalabad	rural	by weighing load	yes	triggered	yes	yes	yes	no injuries observed	overload	no	for more income	no Change in BCS	yes	yes	yes
65	18-30	Faisalabad	peri-urban	by weighing load	yes	triggered	yes	yes	yes	no injuries observed	overload	yes	for more income	no Change in BCS	yes	yes	yes
66	18-30	Faisalabad	peri-urban	by weighing load	yes	triggered	yes	yes	yes	no injuries observed	overload	yes	for more income	no Change in BCS	yes	yes	yes
67	18-30	Faisalabad	peri-urban	by weighing load	yes	triggered	yes	yes	yes	no injuries observed	overload	yes	for more income	no Change in BCS	yes	yes	yes
68	18-30	Faisalabad	peri-urban	by weighing load	yes	triggered	yes	yes	yes	no injuries observed	overload	yes	for more income	no Change in BCS	yes	yes	yes
69	18-30	Faisalabad	peri-urban	by weighing load	yes	triggered	yes	yes	yes	no injuries observed	overload	yes	for more income	no Change in BCS	yes	yes	yes
70	18-30	Faisalabad	peri-urban	by weighing load	yes	triggered	yes	yes	yes	no injuries observed	overload	yes	for more income	no Change in BCS	yes	yes	yes
71	41-50	Faisalabad	peri-urban	adding load approximately	yes	triggered	yes	yes	yes	lameness	overload	no	for more income	bcs increased	yes	yes	yes
72	41-50	Faisalabad	peri-urban	adding load approximately	yes	triggered	yes	yes	yes	back pain	overload	no	for more income	no Change in BCS	yes	yes	yes
73	31-40	Faisalabad	urban	checking donkey behavior	yes	triggered	yes	yes	yes	lameness	overload	no	for more income	bcs decreased	yes	yes	yes
74	31-40	Faisalabad	peri-urban	by weighing load	yes	triggered	yes	yes	yes	no injuries observed	practices of Loading/Unloading	no	for more income	no Change in BCS	yes	yes	yes
75	31-40	Faisalabad	peri-urban	adding load approximately	yes	triggered	yes	yes	yes	no injuries observed	overload	yes	to finish work earlier	no Change in BCS	yes	yes	yes
76	18-30	Faisalabad	peri-urban	by weighing load	yes	triggered	yes	yes	yes	no injuries observed	overload	yes	for more income	no Change in BCS	yes	yes	yes
77	18-30	Faisalabad	peri-urban	by weighing load	yes	triggered	yes	yes	yes	no injuries observed	overload	yes	for more income	no Change in BCS	yes	yes	yes
78	18-30	Faisalabad	peri-urban	by weighing load	yes	triggered	yes	yes	yes	no injuries observed	overload	yes	for more income	no Change in BCS	yes	yes	yes
79	18-30	Faisalabad	peri-urban	by weighing load	yes	triggered	yes	yes	yes	no injuries observed	overload	yes	for more income	no Change in BCS	yes	yes	yes
80	18-30	Faisalabad	peri-urban	by weighing load	yes	triggered	yes	yes	yes	no injuries observed	overload	yes	for more income	no Change in BCS	yes	yes	yes
81	18-30	Faisalabad	peri-urban	by weighing load	yes	triggered	yes	yes	yes	no injuries observed	overload	yes	for more income	no Change in BCS	yes	yes	yes
82	18-30	Faisalabad	peri-urban	by weighing load	yes	triggered	yes	yes	yes	no injuries observed	overload	yes	for more income	no Change in BCS	yes	yes	yes
83	18-30	Faisalabad	peri-urban	by weighing load	yes	triggered	yes	yes	yes	no injuries observed	overload	yes	for more income	no Change in BCS	yes	yes	yes
1	more than 50	Attock	rural	adding load approximately	yes	triggered	no	yes	no	lameness	overload	yes	for more income	no Change in BCS	yes	yes	yes
2	31-40	Attock	rural	i donot know	yes	triggered	yes	yes	yes	no injuries observed	overload	i donot know	for more income	no Change in BCS	yes	yes	yes
3	more than 50	Attock	rural	adding load approximately	yes	triggered	no	yes	yes	no injuries observed	practices of Loading/Unloading	yes	to finish work earlier	no Change in BCS	yes	yes	yes
4	more than 50	Attock	rural	checking donkey behavior	yes	triggered	no	yes	yes	no injuries observed	overload	i donot know	for more income	no Change in BCS	yes	yes	i donot know
5	31-40	Attock	rural	adding load approximately	yes	triggered	no	yes	yes	no injuries observed	overload	yes	to finish work earlier	no Change in BCS	yes	yes	i donot know
6	31-40	Attock	rural	adding load approximately	no	triggered	no	yes	no	no injuries observed	overload	yes	for more income	no Change in BCS	yes	yes	yes
7	31-40	Attock	rural	i donot know	yes	triggered	no	yes	yes	no injuries observed	overload	i donot know	to finish work earlier	no Change in BCS	yes	yes	i donot know
8	31-40	Attock	rural	checking donkey behavior	yes	triggered	yes	yes	yes	no injuries observed	overload	yes	for more income	no Change in BCS	yes	yes	yes
9	31-40	Attock	rural	adding load approximately	yes	triggered	no	yes	yes	no injuries observed	overload	yes	to finish work earlier	bcs decreased	yes	yes	yes
10	31-40	Attock	rural	adding load approximately	yes	triggered	no	yes	yes	lameness	overload	yes	to finish work earlier	no Change in BCS	yes	yes	yes
11	41-50	Attock	rural	adding load approximately	yes	triggered	no	yes	yes	no injuries observed	overload	yes	to finish work earlier	no Change in BCS	yes	yes	yes
12	41-50	Attock	rural	checking donkey behavior	yes	triggered	no	yes	yes	wound	overload	yes	for more income	no Change in BCS	yes	yes	yes
13	41-50	Attock	rural	adding load approximately	yes	triggered	no	yes	yes	no injuries observed	practices of Loading/Unloading	yes	to finish work earlier	no Change in BCS	yes	yes	yes
14	41-50	Attock	rural	adding load approximately	yes	triggered	no	yes	yes	no injuries observed	type of load	yes	to finish work earlier	no Change in BCS	yes	yes	yes
15	18-30	Attock	rural	adding load approximately	yes	triggered	yes	yes	yes	no injuries observed	overload	yes	to finish work earlier	no Change in BCS	yes	yes	yes
16	18-30	Attock	rural	adding load approximately	yes	triggered	no	yes	yes	wound	overload	yes	to finish work earlier	no Change in BCS	yes	yes	yes
17	41-50	Attock	rural	adding load approximately	yes	chosen by donkey	yes	yes	yes	no injuries observed	overload	i donot know	to finish work earlier	bcs increased	yes	yes	yes
18	31-50	Attock	rural	i donot know	yes	triggered	no	yes	yes	no injuries observed	overload	yes	to finish work earlier	bcs increased	yes	yes	i donot know
19	more than 50	Attock	rural	adding load approximately	yes	triggered	no	yes	yes	no injuries observed	overload	yes	for more income	no Change in BCS	yes	yes	yes
20	more than 50	Attock	rural	checking donkey behavior	yes	triggered	no	yes	yes	no injuries observed	overload	yes	to finish work earlier	no Change in BCS	yes	yes	yes
21	more than 50	Attock	rural	adding load approximately	yes	triggered	no	yes	yes	wound	overload	yes	for more income	no Change in BCS	yes	yes	yes
22	more than 50	Attock	rural	i donot know	no	triggered	no	yes	no	wound	overload	yes	to finish work earlier	no Change in BCS	yes	yes	yes
23	more than 50	Attock	rural	adding load approximately	yes	triggered	no	no	yes	no injuries observed	overload	yes	to finish work earlier	no Change in BCS	yes	yes	i donot know
24	31-40	Attock	rural	adding load approximately	yes	triggered	no	yes	yes	wound	overload	yes	for more income	no Change in BCS	yes	yes	yes
25	31-40	Attock	rural	adding load approximately	yes	triggered	no	yes	yes	lameness	overload	yes	for more income	bcs increased	yes	yes	i donot know
26	31-40	Attock	rural	adding load approximately	yes	triggered	no	yes	yes	no injuries observed	overload	i donot know	to finish work earlier	no Change in BCS	yes	yes	i donot know
27	41-50	Attock	rural	adding load approximately	yes	triggered	no	yes	yes	lameness	overload	yes	to finish work earlier	no Change in BCS	yes	yes	i donot know
28	31-40	Attock	rural	adding load approximately	yes	triggered	no	yes	yes	no injuries observed	overload	yes	for more income	no Change in BCS	yes	yes	yes
29	31-40	Attock	rural	adding load approximately	yes	triggered	no	yes	yes	lameness	overload	yes	for more income	no Change in BCS	yes	yes	yes
30	31-40	Attock	rural	i donot know	yes	triggered	yes	yes	yes	lameness	overload	yes	for more income	bcs increased	yes	yes	yes
31	41-50	Attock	rural	adding load approximately	yes	triggered	no	yes	yes	no injuries observed	overload	yes	for more income	no Change in BCS	yes	yes	yes
32	41-50	Attock	rural	checking donkey behavior	yes	triggered	no	yes	yes	no injuries observed	overload	yes	to finish work earlier	no Change in BCS	yes	yes	i donot know
33	31-40	Attock	rural	adding load approximately	yes	triggered	no	yes	no	no injuries observed	overload	yes	for more income	no Change in BCS	yes	yes	yes
34	18-30	Attock	rural	adding load approximately	yes	triggered	no	yes	yes	no injuries observed	practices of Loading/Unloading	yes	to finish work earlier	bcs decreased	yes	yes	yes
35	more than 50	Attock	rural	adding load approximately	yes	triggered	no	yes	yes	lameness	overload	yes	to finish work earlier	no Change in BCS	yes	yes	i donot know
36	41-50	Attock	rural	adding load approximately	yes	triggered	yes	yes	yes	wound	overload	yes	to finish work earlier	no Change in BCS	yes	yes	yes
37	41-50	Attock	rural	adding load approximately	yes	chosen by donkey	no	yes	yes	lameness	overload	yes	to finish work earlier	no Change in BCS	yes	yes	yes
38	31-40	Attock	rural	i donot know	yes	chosen by donkey	no	yes	yes	lameness	overload	yes	for more income	no Change in BCS	yes	yes	yes
39	41-50	Attock	rural	checking donkey behavior	yes	chosen by donkey	no	yes	yes	no injuries observed	overload	yes	to finish work earlier	no Change in BCS	yes	yes	i donot know
40	31-40	Attock	rural	adding load approximately	yes	triggered	no	yes	yes	no injuries observed	overload	yes	to finish work earlier	no Change in BCS	yes	yes	i donot know
41	more than 50	Attock	rural	adding load approximately	yes	triggered	no	yes	yes	lameness	overload	yes	to finish work earlier	no Change in BCS	yes	yes	i donot know
42	41-50	Attock	rural	adding load approximately	yes	triggered	no	yes	yes	lameness	overload	yes	to finish work earlier	no Change in BCS	yes	yes	yes
43	18-30	Attock	rural	adding load approximately	yes	triggered	no	yes	yes	lameness	overload	yes	for more income	no Change in BCS	yes	yes	yes
44	31-40	Attock	rural	adding load approximately	yes	triggered	no	yes	yes	lameness	overload	yes	to finish work earlier	no Change in BCS	yes	yes	yes
45	31-40	Attock	rural	adding load approximately	yes	chosen by donkey	no	yes	yes	wound	overload	i donot know	for more income	no Change in BCS	yes	yes	yes
46	31-40	Attock	rural	adding load approximately	yes	chosen by donkey	no	yes	no	wound	type of load	i donot know	for more income	no change in bcs	yes	yes	yes
47	31-40	Attock	rural	adding load approximately	yes	chosen by donkey	no	yes	no	no injuries observed	overload	i donot know	for more income	no Change in BCS	yes	yes	i donot know
48	41-50	Attock	rural	adding load approximately	yes	chosen by donkey	no	yes	yes	no injuries observed	overload	yes	for more income	no Change in BCS	yes	yes	yes
49	18-30	Attock	rural	adding load approximately	yes	triggered	yes	yes	yes	no injuries observed	overload	yes	for more income	no Change in BCS	yes	yes	yes
50	41-50	Attock	rural	adding load approximately	yes	triggered	no	yes	yes	no injuries observed	overload	yes	for more income	no Change in BCS	yes	yes	yes
51	31-40	Attock	rural	adding load approximately	yes	triggered	no	yes	yes	no injuries observed	overload	yes	to finish work earlier	no Change in BCS	yes	yes	i donot know
52	31-40	Attock	rural	i donot know	yes	triggered	no	yes	no	no injuries observed	overload	yes	for more income	no Change in BCS	yes	yes	yes
53	31-40	Attock	rural	adding load approximately	yes	triggered	no	yes	yes	no injuries observed	overload	yes	to finish work earlier	no Change in BCS	yes	yes	yes
54	31-40	Attock	rural	checking donkey behavior	yes	triggered	no	yes	yes	no injuries observed	overload	i donot know	for more income	no Change in BCS	yes	yes	yes
55	31-40	Attock	rural	adding load approximately	yes	triggered	no	yes	yes	no injuries observed	type of load	yes	to finish work earlier	no Change in BCS	yes	yes	yes
56	41-50	Attock	rural	adding load approximately	yes	triggered	no	yes	yes	no injuries observed	overload	i donot know	for more income	bcs decreased	yes	yes	i donot know
57	41-50	Attock	rural	adding load approximately	yes	triggered	no	yes	yes	wound	overload	yes	for more income	no Change in BCS	yes	yes	yes
58	41-50	Attock	rural	adding load approximately	yes	triggered	no	yes	yes	no injuries observed	overload	yes	for more income	no Change in BCS	yes	yes	yes
59	31-40	Attock	rural	adding load approximately	yes	triggered	no	yes	yes	no injuries observed	overload	yes	for more income	no Change in BCS	yes	yes	yes
60	31-40	Attock	rural	checking donkey behavior	yes	triggered	no	yes	yes	wound	overload	yes	to finish work earlier	no Change in BCS	yes	yes	yes
61	31-40	Attock	rural	adding load approximately	yes	triggered	no	yes	yes	no injuries observed	overload	yes	for more income	no Change in BCS	yes	yes	yes
62	31-40	Attock	rural	adding load approximately	yes	triggered	no	yes	yes	no injuries observed	overload	yes	to finish work earlier	no Change in BCS	yes	yes	i donot know
63	31-40	Attock	rural	adding load approximately	yes	triggered	no	yes	yes	lameness	overload	yes	for more income	no Change in BCS	yes	yes	i donot know
64	31-40	Attock	rural	adding load approximately	yes	triggered	no	yes	yes	lameness	overload	yes	for more income	no Change in BCS	yes	yes	yes
65	31-40	Attock	rural	adding load approximately	yes	triggered	no	yes	yes	lameness	overload	yes	for more income	no Change in BCS	yes	yes	yes
66	31-40	Attock	rural	adding load approximately	yes	triggered	no	yes	yes	wound	overload	yes	to finish work earlier	no Change in BCS	yes	yes	i donot know
67	31-40	Attock	rural	adding load approximately	yes	triggered	no	yes	no	no injuries observed	overload	yes	to finish work earlier	no Change in BCS	yes	yes	i donot know
68	31-40	Attock	rural	adding load approximately	yes	triggered	no	yes	yes	no injuries observed	overload	yes	for more income	no Change in BCS	yes	yes	yes
69	31-40	Attock	rural	adding load approximately	yes	triggered	no	yes	yes	no injuries observed	overload	yes	for more income	no Change in BCS	yes	yes	yes
70	41-50	Attock	rural	adding load approximately	yes	triggered	no	yes	yes	no injuries observed	overload	yes	to finish work earlier	no Change in BCS	yes	yes	yes
71	31-40	Attock	rural	adding load approximately	yes	triggered	no	yes	no	no injuries observed	overload	yes	to finish work earlier	no Change in BCS	yes	yes	yes
72	18-30	Attock	rural	adding load approximately	yes	triggered	no	yes	yes	no injuries observed	overload	yes	for more income	no Change in BCS	yes	yes	i donot know
73	31-40	Attock	rural	adding load approximately	yes	triggered	no	yes	yes	no injuries observed	overload	yes	for more income	no Change in BCS	yes	yes	yes
74	31-40	Attock	rural	checking donkey behavior	yes	triggered	yes	yes	yes	no injuries observed	overload	i donot know	for more income	no Change in BCS	yes	yes	yes
75	31-40	Attock	rural	i donot know	yes	chosen by donkey	no	yes	yes	no injuries observed	overload	i donot know	for more income	no Change in BCS	yes	yes	i donot know
76	31-40	Attock	rural	adding load approximately	yes	triggered	no	yes	yes	no injuries observed	practices of loading/unloading	yes	for more income	bcs increased	yes	yes	i donot know
77	31-40	Attock	rural	adding load approximately	yes	triggered	no	yes	yes	no injuries observed	overload	yes	for more income	no Change in BCS	yes	yes	i donot know
78	31-40	Attock	rural	checking donkey behavior	yes	triggered	no	yes	yes	no injuries observed	overload	yes	for more income	bcs decreased	yes	yes	i donot know
79	18-30	Attock	rural	checking donkey behavior	yes	triggered	no	yes	yes	no injuries observed	overload	yes	for more income	bcs decreased	yes	yes	yes
80	41-50	Attock	rural	checking donkey behavior	yes	triggered	no	yes	yes	no injuries observed	overload	i donot know	for more income	no Change in BCS	yes	yes	i donot know
81	31-40	Attock	rural	adding load approximately	yes	triggered	no	yes	yes	lameness	overload	yes	to finish work earlier	no Change in BCS	yes	yes	yes
82	31-40	Attock	rural	adding load approximately	yes	triggered	no	yes	yes	no injuries observed	overload	i donot know	for more income	no Change in BCS	yes	yes	yes
83	more than 50	Attock	rural	adding load approximately	no	triggered	no	yes	no	lameness	overload	yes	to finish work earlier	no Change in BCS	no	yes	i donot know
1	18-30	Swat	Urban	checking donkey behavior	No	triggered by owner	yes	yes	yes	no injuries observed	practices of loading/unloading	yes	to finish work earlier	bcs increased	yes	yes	yes
2	31-40	Swat	urban	checking donkey behavior	no	chosen by donkey	yes	no	no	Wound	type of load	I donot know	to finish work earlier	bcs increased	yes	yes	yes
3	31-40	Swat	urban	checking donkey behavior	no	chosen by donkey	yes	no	no	wound	type of load	no	for more income	bcs decreased	yes	yes	yes
4	18-30	Swat	urban	adding load approximately	no	chosen by donkey	yes	no	no	no injuries observed	overload	yes	for more income	no change in bcs	yes	yes	yes
5	41-50	Swat	urban	adding load approximately	no	chosen by donkey	yes	yes	yes	wound	practices of loading/unloading	i donot know	for more income	no change in bcs	yes	yes	yes
6	18-30	Swat	urban	adding load approximately	no	chosen by donkey	yes	no	no	no injuries observed	type of load	yes	for more income	no change in bcs	yes	yes	i donot know
7	more than 50	Swat	rural	adding load approximately	no	triggered by owner	no	no	no	wound	type of load	i donot know	for more income	bcs decreased	yes	yes	i donot know
8	31-40	Swat	rural	i donot know	no	chosen by donkey	yes	no	no	lameness	practices of loading/unloading	i donot know	to finish work earlier	bcs increased	yes	yes	yes
9	18-30	Swat	peri-urban	checking donkey behavior	no	chosen by donkey	yes	yes	no	no injuries observed	practices of loading/unloading	i donot know	to finish work earlier	bcs decreased	yes	yes	yes
10	31-40	Swat	peri-urban	adding load approximately	no	chosen by donkey	yes	no	no	no injuries observed	overload	i donot know	for more income	bcs decreased	yes	yes	i donot know
11	41-50	Swat	rural	checking donkey behavior	no	chosen by donkey	yes	yes	no	wound	practices of loading/unloading	no	to finish work earlier	no change in bcs	yes	yes	i donot know
12	31-40	Swat	rural	checking donkey behavior	no	chosen by donkey	yes	no	no	no injuries observed	practices of loading/unloading	i donot know	to finish work earlier	bcs increased	yes	yes	yes
13	41-50	Swat	rural	adding load approximately	no	chosen by donkey	yes	yes	yes	no injuries observed	practices of loading/unloading	yes	to finish work earlier	no change in bcs	yes	yes	yes
14	31-40	Swat	rural	adding load approximately	no	chosen by donkey	yes	yes	yes	wound	practices of loading/unloading	i donot know	for more income	no change in bcs	yes	yes	yes
15	41-50	Swat	peri-urban	by weighing load	no	triggered by owner	no	no	no	no injuries observed	type of load	i donot know	to finish work earlier	bcs decreased	yes	yes	i donot know
16	31-40	Swat	peri-urban	checking donkey behavior	no	chosen by donkey	yes	no	no	back pain	practices of loading/unloading	no	for more income	no change in bcs	yes	yes	i donot know
17	18-30	Swat	peri-urban	adding load approximately	yes	triggered by owner	yes	no	no	wound	practices of loading/unloading	i donot know	to finish work earlier	bcs increased	i donot know	yes	no
18	more than 50	Swat	peri-urban	adding load approximately	no	triggered by owner	yes	no	no	wound	overload	i donot know	to finish work earlier	bcs decreased	yes	yes	i donot know
19	31-40	Swat	rural	adding load approximately	no	triggered by owner	yes	no	no	lameness	practices of loading/unloading	i donot know	to finish work earlier	no change in bcs	yes	yes	yes
20	41-50	Swat	rural	adding load approximately	no	chosen by donkey	yes	no	no	wound	overload	i donot know	to finish work earlier	no change in bcs	yes	yes	no
21	41-50	Swat	rural	checking donkey behavior	no	chosen by donkey	yes	no	no	no injuries observed	type of load	i donot know	to finish work earlier	bcs increased	yes	yes	i donot know
22	31-40	Swat	rural	checking donkey behavior	no	chosen by donkey	yes	no	no	wound	practices of loading/unloading	i donot know	for more income	bcs increased	yes	yes	yes
23	18-30	Swat	rural	adding load approximately	no	chosen by donkey	yes	no	no	wound	practices of loading/unloading	yes	to finish work earlier	bcs decreased	i donot know	yes	i donot know
24	41-50	Swat	rural	adding load approximately	no	chosen by donkey	yes	yes	yes	no injuries observed	practices of loading/unloading	i donot know	for more income	no change in bcs	i donot know	yes	i donot know
25	more than 50	Swat	peri-urban	adding load approximately	no	chosen by donkey	yes	yes	no	wound	type of load	no	for more income	no change in bcs	i donot know	yes	yes
26	41-50	Swat	rural	checking donkey behavior	no	chosen by donkey	yes	no	yes	wound	practices of loading/unloading	i donot know	to finish work earlier	no change in bcs	no	yes	i donot know
27	41-50	Swat	peri-urban	adding load approximately	no	chosen by donkey	no	no	yes	wound	practices of loading/unloading	i donot know	for more income	no change in bcs	i donot know	yes	i donot know
28	41-50	Swat	rural	adding load approximately	no	chosen by donkey	yes	no	yes	wound	practices of loading/unloading	i donot know	for more income	bcs increased	i donot know	yes	yes
29	18-30	Swat	peri-urban	i donot know	no	chosen by donkey	yes	no	yes	wound	practices of loading/unloading	i donot know	for more income	no change in bcs	no	yes	i donot know
30	18-30	Swat	peri-urban	adding load approximately	no	chosen by donkey	yes	no	yes	no injuries observed	overload	i donot know	to finish work earlier	no change in bcs	no	yes	yes
31	18-30	Swat	urban	adding load approximately	no	chosen by donkey	no	yes	no	wound	overload	yes	for more income	no change in bcs	i donot know	yes	i donot know
32	31-40	Swat	rural	checking donkey behavior	no	chosen by donkey	yes	no	yes	wound	practices of loading/unloading	i donot know	for more income	bcs decreased	i donot know	yes	i donot know
33	31-40	Swat	peri-urban	checking donkey behavior	no	chosen by donkey	no	yes	no	wound	type of load	i donot know	for more income	no change in bcs	i donot know	yes	yes
34	31-40	Swat	rural	checking donkey behavior	no	chosen by donkey	yes	no	no	wound	type of load	i donot know	to finish work earlier	no change in bcs	yes	yes	i donot know
35	31-40	Swat	urban	checking donkey behavior	no	chosen by donkey	yes	yes	no	back pain	practices of loading/unloading	i donot know	to finish work earlier	no change in bcs	no	yes	i donot know
36	18-30	Swat	rural	by weighing load	no	chosen by donkey	no	no	no	back pain	type of load	i donot know	to finish work earlier	no change in bcs	yes	yes	yes
37	41--50	Swat	urban	checking donkey behavior	no	chosen by donkey	no	no	yes	wound	type of load	i donot know	for more income	bcs decreased	no	i donot know	i donot know
38	18-30	Swat	urban	checking donkey behavior	no	triggered by owner	no	yes	no	wound	overload	yes	to finish work earlier	bcs increased	no	yes	i donot know
39	41-50	Swat	peri-urban	checking donkey behavior	no	chosen by donkey	yes	no	no	wound	overload	i donot know	to finish work earlier	bcs increased	no	yes	yes
40	more than 50	Swat	rural	checking donkey behavior	yes	chosen by donkey	yes	no	no	back pain	practices of loading/unloading	i donot know	to finish work earlier	bcs increased	yes	yes	i donot know
41	31-40	Swat	rural	by weighing load	no	chosen by donkey	yes	no	yes	wound	practices of loading/unloading	i donot know	to finish work earlier	bcs increased	no	yes	i donot know
42	18-30	Swat	peri-urban	checking donkey behavior	no	chosen by donkey	yes	no	no	wound	practices of loading/unloading	i donot know	to finish work earlier	bcs increased	no	yes	yes
43	31-40	Swat	urban	adding load approximately	no	chosen by donkey	yes	yes	no	no injuries observed	practices of loading/unloading	i donot know	to finish work earlier	no change in bcs	yes	no	i donot know
44	31-40	Swat	peri-urban	checking donkey behavior	yes	chosen by donkey	yes	yes	no	no injuries observed	overload	i donot know	to finish work earlier	no change in bcs	yes	yes	yes
45	31-40	Swat	rural	adding load approximately	no	chosen by donkey	yes	no	yes	no injuries observed	practices of loading/unloading	i donot know	for more income	no change in bcs	no	yes	no
46	31-40	Swat	rural	checking donkey behavior	no	chosen by donkey	yes	no	no	no injuries observed	practices of loading/unloading	yes	for more income	bcs decreased	yes	no	yes
47	41-50	Swat	rural	adding load approximately	no	chosen by donkey	yes	no	no	wound	practices of loading/unloading	i donot know	for more income	no change in bcs	yes	yes	yes
48	31-40	Swat	rural	by weighing load	no	chosen by donkey	no	yes	no	no injuries observed	type of load	i donot know	for more income	bcs increased	no	yes	i donot know
49	41-50	Swat	rural	checking donkey behavior	no	triggered by owner	yes	no	yes	no injuries observed	overload	i donot know	to finish work earlier	bcs increased	yes	no	yes
50	18-30	Swat	rural	checking donkey behavior	no	triggered by owner	no	no	no	wound	overload	i donot know	to finish work earlier	no change in bcs	no	yes	i donot know
51	31-40	Swat	rural	adding load approximately	no	chosen by donkey	yes	no	yes	wound	type of load	yes	to finish work earlier	bcs decreased	yes	yes	i donot know
52	18-30	Swat	rural	adding load approximately	no	chosen by donkey	yes	no	no	wound	practices of loading/unloading	i donot know	for more income	bcs increased	no	yes	yes
53	31-40	Swat	rural	by weighing load	no	chosen by donkey	yes	no	yes	wound	type of load	yes	for more income	bcs increased	i donot know	yes	i donot know
54	31-40	Swat	rural	checking donkey behavior	no	triggered by owner	no	yes	yes	no injuries observed	practices of loading/unloading	yes	to finish work earlier	bcs increased	i donot know	yes	i donot know
55	31-40	Swat	rural	checking donkey behavior	no	chosen by donkey	no	yes	yes	wound	practices of loading/unloading	i donot know	to finish work earlier	bcs decreased	i donot know	i donot know	i donot know
56	41-50	Swat	rural	adding load approximately	no	chosen by donkey	no	yes	no	wound	practices of loading/unloading	i donot know	for more income	bcs increased	no	yes	yes
57	31-40	Swat	rural	adding load approximately	no	chosen by donkey	no	yes	yes	wound	practices of loading/unloading	i donot know	for more income	bcs decreased	no	yes	yes
58	41-50	Swat	rural	adding load approximately	no	chosen by donkey	yes	no	yes	wound	practices of loading/unloading	i donot know	for more income	no change in bcs	i donot know	yes	yes
59	41-50	Swat	urban	adding load approximately	no	chosen by donkey	yes	no	yes	wound	practices of loading/unloading	i donot know	to finish work earlier	no change in bcs	no	yes	yes
60	41-50	Swat	rural	checking donkey behavior	no	chosen by donkey	yes	yes	yes	wound	type of load	i donot know	to finish work earlier	bcs decreased	i donot know	no	yes
61	41-50	Swat	rural	adding load approximately	no	chosen by donkey	yes	no	no	wound	practices of loading/unloading	i donot know	for more income	bcs increased	no	yes	yes
62	41-50	Swat	rural	adding load approximately	no	triggered by owner	yes	no	yes	wound	practices of loading/unloading	i donot know	for more income	no change in bcs	no	i donot know	i donot know
63	41-50	Swat	rural	adding load approximately	no	chosen by donkey	no	yes	no	wound	practices of loading/unloading	i donot know	to finish work earlier	bcs decreased	i donot know	yes	yes
64	41-50	Swat	rural	adding load approximately	no	triggered by owner	no	yes	no	back pain	practices of loading/unloading	i donot know	for more income	bcs decreased	i donot know	no	i donot know
65	41-50	Swat	rural	i donot know	no	triggered by owner	no	yes	yes	wound	practices of loading/unloading	i donot know	for more income	bcs increased	i donot know	yes	yes
66	41-50	Swat	rural	adding load approximately	no	triggered by owner	no	yes	yes	wound	practices of loading/unloading	i donot know	for more income	bcs increased	no	yes	i donot know
67	31-40	Swat	rural	checking donkey behavior	yes	triggered by owner	yes	yes	no	wound	practices of loading/unloading	i donot know	to finish work earlier	bcs increased	no	yes	i donot know
68	18-30	Swat	rural	checking donkey behavior	no	triggered by owner	no	yes	no	wound	overload	i donot know	to finish work earlier	bcs increased	i donot know	yes	i donot know
69	41-50	Swat	rural	checking donkey behavior	no	triggered by owner	yes	no	yes	wound	practices of loading/unloading	i donot know	for more income	bcs increased	yes	no	yes
70	41-50	Swat	rural	checking donkey behavior	no	chosen by donkey	yes	no	yes	wound	practices of loading/unloading	yes	to finish work earlier	no change in bcs	yes	yes	i donot know
71	41-50	Swat	rural	checking donkey behavior	no	triggered by owner	yes	yes	yes	back pain	practices of loading/unloading	i donot know	for more income	bcs decreased	no	yes	i donot know
72	41-50	Swat	rural	checking donkey behavior	no	triggered by owner	no	yes	no	back pain	practices of loading/unloading	i donot know	for more income	bcs decreased	i donot know	yes	yes
73	more than 50	Swat	urban	checking donkey behavior	no	chosen by donkey	yes	no	no	back pain	practices of loading/unloading	i donot know	to finish work earlier	bcs increased	no	yes	yes
74	41-50	Swat	rural	i donot know	no	triggered by owner	yes	no	yes	back pain	overload	i donot know	for more income	bcs increased	yes	yes	yes
75	18-30	Swat	rural	checking donkey behavior	no	triggered by owner	yes	no	yes	wound	practices of loading/unloading	i donot know	for more income	bcs increased	no	yes	yes
76	41-50	Swat	rural	checking donkey behavior	yes	triggered by owner	no	yes	no	wound	overload	i donot know	for more income	bcs increased	yes	no	yes
77	41-50	Swat	rural	by weighing load	no	triggered by owner	no	yes	yes	back pain	practices of loading/unloading	i donot know	to finish work earlier	bcs increased	no	yes	i donot know
78	18--30	Swat	rural	checking donkey behavior	no	chosen by donkey	yes	no	yes	wound	practices of loading/unloading	i donot know	to finish work earlier	bcs increased	no	yes	i donot know
79	41--50	Swat	rural	checking donkey behavior	no	triggered by owner	no	yes	yes	back pain	overload	i donot know	for more income	no change in bcs	no	yes	i donot know
80	18-30	Swat	rural	by weighing load	no	chosen by donkey	yes	yes	yes	back pain	practices of loading/unloading	i donot know	to finish work earlier	bcs increased	no	i donot know	i donot know
81	more than 50	Swat	urban	checking donkey behavior	no	chosen by donkey	no	no	no	back pain	practices of loading/unloading	i donot know	to finish work earlier	bcs increased	no	yes	yes
82	more than 50	Swat	urban	by weighing load	no	chosen by donkey	yes	yes	no	back pain	practices of loading/unloading	i donot know	to finish work earlier	bcs increased	yes	no	i donot know
83	41-50	Swat	peri-urban	checking donkey behavior	no	chosen by donkey	no	yes	no	no injuries observed	practices of loading/unloading	i donot know	for more income	bcs increased	i donot know	yes	yes
